# Supplementary material
Source: Research Square preprint supplement (doi:10.21203/rs.3.rs-9488994/v1)
Supplement: Supplementary file 1 [file 39cd6452228801e3463c03f0.docx]

Rapid invasion, pathogen spillover, and native bumblebee decline on an isolated island in southern Chile

Cecilia Smith-Ramírez1,2, Nolberto Arismendi3, Adriana Rendón2, Vanessa Durán-Sanzana4 & Rodrigo M. Barahona-Segovia1

1Dpto. de Ciencias Básicas y Biodiversidad, Universidad de Los Lagos, Av. Fuchslocher 1305, Osorno, Chile

2Instituto de Ecología y Biodiversidad (IEB), Las Palmeras 3425, Universidad de Chile

3Centro de Investigación Austral Biotech, Facultad de Ciencias, Universidad Santo Tomás, Av. Ramón Picarte 1130-1160, Valdivia, Chile

**Table S1**. Primers used for the detection and quantification by real-time PCR of *Trypanosoma*, microsporidia, and neogregarinorida in native and non-native bumble bees from Guafo Island.

| **Pathogen** | **Primer** | **Sequence (5´to 3´)** | **Target gene** | **Amplicon (bp)** | **Reference** |
| --- | --- | --- | --- | --- | --- |
| *Nosema bombi* | BOMBICAR-F | GGCCCATGCATGTTTTTGAAGATTATTAT | SSU rRNA | 99 | Plischuk et al*.* 2009 |
| BOMBICAR-R | CTACACTTTAACGTAGTTATCTGCGG |
| *Crithidia bombi* | CbCytbF1 | TTTTAGTGTGGGCTGTTGGATTT | Cytochrome b | 218 | Arismendi et al. 2021 |
| CbCytbR | ATGCAACACATGTAATTTCAGTAACG |
| *Apicystis bombi* | ApBF1 | CGTACTGCCCTGAATACTCCAG | SSU rDNA | 294 | Meeus et al*.* 2010 |
| ApBR1 | TGAAAGCGGCGTATACATGA |
| *Lotmaria passim* | Lp5F | GGCGTCCGTGATTTTTACTGTGACTA | SSU rRNA | 186 | Arismendi et al. 2021 |
| Lp5R | ACCACAAGAGTACGGAATGCGAAAG |
| *Nosema ceranae* | Nc841f | GAGAGAACGGTTTTTTGTTTGAGA | SSU rRNA | 140 | Huang and Solter 2013 |
| Nc980r | ATCCTTTCCTTCCTACACTGATTG |
| RPS5 (endogen gene) | RPS5-F | AATTATTTGGTCGCTGGAATTG | RPS5 | 115 | Evans and Pettis 2005 |
| RPS5-R | TAACGTCCAGCAGAATGTGGTA |

Table S2. Threshold cycle (Ct) values of Trypanosoma, Microsporidia, and Neogregarinorida in fecal samples of native and non‑native bumble bees collected on Guafo Island, Chile

| Sample | Species | DNA1 (ng/µL) | RPS5 gene | *Apicystis bombi* | *Crithidia bombi* | *Nosema bombi* | *Nosema ceranae* | *Lotmaria passim* |
| --- | --- | --- | --- | --- | --- | --- | --- | --- |
| 238 | *Bombus dahlbomii* | 4.0 | 31.46 | No ct | No ct | No ct | No ct | 32.37 |
| 239 | *Bombus dahlbomii* | 2.5 | 32.17 | No ct | No ct | No ct | No ct | No ct |
| 240 | *Bombus dahlbomii* | 2.7 | 34.42 | No ct | 30.68 | No ct | No ct | 32.29 |
| 241 | *Bombus dahlbomii* | 2.0 | 32.08 | No ct | No ct | No ct | No ct | 32.60 |
| 242 | *Bombus dahlbomii* | 2.1 | 32.18 | No ct | No ct | No ct | No ct | No ct |
| 243 | *Bombus dahlbomii* | 2.8 | 35.00 | No ct | No ct | No ct | No ct | No ct |
| 244 | *Bombus dahlbomii* | 3.5 | 32.64 | No ct | No ct | No ct | No ct | 33.14 |
| 245 | *Bombus dahlbomii* | 3.5 | 33.11 | No ct | No ct | No ct | No ct | No ct |
| 246 | *Bombus dahlbomii* | 3.4 | 33.53 | No ct | No ct | No ct | No ct | 30.96 |
| 247 | *Bombus dahlbomii* | 2.0 | 32.97 | No ct | No ct | No ct | No ct | No ct |
| 248 | *Bombus dahlbomii* | 1.9 | 31.84 | No ct | No ct | No ct | No ct | 32.00 |
| 249 | *Bombus dahlbomii* | 3.4 | 32.94 | No ct | No ct | No ct | No ct | 33.12 |
| 250 | *Bombus dahlbomii* | 2.6 | 33.87 | No ct | No ct | No ct | No ct | 36.09 |
| 251 | *Bombus terrestris* | 1.7 | 31.40 | No ct | No ct | No ct | No ct | No ct |
| 252 | *Bombus terrestris* | 2.4 | 31.56 | No ct | No ct | No ct | No ct | No ct |
| 253 | *Bombus terrestris* | 2.4 | 32.51 | No ct | No ct | No ct | No ct | 31.44 |
| 254 | *Bombus terrestris* | 2.1 | 33.86 | No ct | No ct | No ct | No ct | No ct |
| 255 | *Bombus terrestris* | 3.4 | 31.11 | No ct | No ct | No ct | No ct | 33.35 |
| 256 | *Bombus terrestris* | 1.9 | 29.39 | No ct | No ct | No ct | No ct | No ct |
| 257 | *Bombus terrestris* | 2.8 | 31.57 | No ct | No ct | No ct | No ct | No ct |
| 258 | *Bombus terrestris* | 1.8 | 32.57 | No ct | No ct | No ct | No ct | 30.97 |
| 259 | *Bombus terrestris* | 2.7 | 37.79 | No ct | No ct | No ct | No ct | No ct |
| 260 | *Bombus terrestris* | 2.9 | 33.83 | No ct | No ct | No ct | No ct | No ct |
| 261 | *Bombus terrestris* | 3.5 | 32.00 | No ct | 29.74 | No ct | No ct | No ct |
| 262 | *Bombus terrestris* | 2.0 | 32.89 | No ct | No ct | No ct | No ct | No ct |
| 263 | *Bombus terrestris* | 2.5 | 33.80 | No ct | No ct | No ct | No ct | No ct |
| 264 | *Bombus terrestris* | 2.6 | 31.18 | No ct | 32.82 | No ct | No ct | No ct |
| 265 | *Bombus terrestris* | 2.5 | 29.99 | No ct | No ct | No ct | No ct | 32.57 |
| 266 | *Bombus terrestris* | 2.0 | 31.17 | No ct | No ct | No ct | No ct | 32.72 |
| 267 | *Bombus terrestris* | 4.4 | 32.44 | No ct | 34.71 | No ct | No ct | No ct |
| C+ | *-* | 20.0 | 19.21 | 17.33 | 18.31 | 20.19 | 19.37 | 19.08 |
| C+ | *-* | 20.0 | 22.60 | 20.70 | 21.45 | 22.75 | 22.79 | 22.28 |
| C | *-* | *-* | No ct | No ct | No ct | No ct | No ct | No ct |
| C- | *-* | *-* | No ct | No ct | No ct | No ct | No ct | No ct |

1DNA was extracted from feces samples by centrifuging the samples at 10,000 xg for 15 min at 4 °C. Then, the precipitated extract was ground in 1.5 mL microcentrifuge tubes using sterile plastic pestles with 350 µL of CTL buffer following the manufacture instructions of E.Z.N.A Insect DNA Kit (OMEGA, Bio-Tek Inc., Atlanta, GA, USA) and according to the procedures described by Arismendi et al. (2016; 2021). Quantitative real-time PCR (qPCR) was conducted with specific primers (Table S1) and according to the protocol described in the manuscript.

C+ = Positive control; C- = Negative control; No ct4 = Nothreshold cycles (no DNA amplification).

Ct values <20 indicates a high pathogen load; Ct values 21-30 indicates moderate pathogen load; Ct values >30 indicates low pathogen load.

**REFERENCES**

Arismendi N, Bruna A, Zapata N, Vargas M (2016) Molecular detection of the tracheal mite *Locustacarus buchneri* in native and non-native bumble bees in Chile. Insectes Soc 63:629–633. https://doi.org/10.1007/s00040-016-0502-2

Arismendi N, Riveros G, Zapata N, Smagghe G, González C, Vargas M (2021). Occurrence of bee viruses and pathogens associated with emerging infectious diseases in native and non-native bumble bees in southern Chile. Biol Invasions 23:1175–1189. <https://doi.org/10.1007/s10530-020-02428-w>

Evans JD, Pettis JS (2005) Colony-level impacts of immune responsiveness in honey bees, *Apis mellifera*. Evolution 59:2270–2274.

[doi.org/10.1111/j.0014-3820.2005.tb00935.x](https://doi.org/10.1111/j.0014-3820.2005.tb00935.x)

Huang WF, Solter LF (2013) Comparative development and tissue tropism of *Nosema apis* and *Nosema ceranae*. J Invert Pathol 113:35–41 <https://doi.org/10.1016/j.jip.2013.01.001>

Meeus I, Brown MJF, De Graaf DC, Smagghe G (2011) Effects of invasive parasites on bumblebee declines. Conserv Biol 25:662–671. <https://doi.org/10.1111/j.1523-1739.2011.01707.x>

Plischuk S, Martín-Hernández R, Prieto L, Lucía, M., Botías C, Meana A, Abrahamovich AH, Lange C, Higes M (2009) South American native bumblebees (Hymenoptera: Apidae) infected by *Nosema ceranae* (Microsporidia), an emerging pathogen of honeybees (*Apis mellifera).* Environ Microbiol Reports 1:131–135. <https://doi.org/10.1111/j.1758-2229.2009.00018.x>
